CORRECTION

# Correction: A single $\beta$ -octyl glucoside molecule induces HIV-1 Nef dimer formation in the absence of partner protein binding

The PLOS ONE Staff

The Funding statement is incorrect. The publisher apologizes for this error. The correct statement is: This work was supported by National Institute of Allergy and Infectious Diseases (grant nos. AI057083 and AI102724 to TES; contract no. HHSN272201400010I to Southern Research Institute). The funders had no role in study design, data collection and analysis, decision to publish, or preparation of the manuscript.

## Reference

1. Wu M, Alvarado JJ, Augelli-Szafran CE, Ptak RG, Smithgall TE (2018) A single  $\beta$ -octyl glucoside molecule induces HIV-1 Nef dimer formation in the absence of partner protein binding. PLoS ONE 13(2): e0192512. <https://doi.org/10.1371/journal.pone.0192512> PMID: 29415006

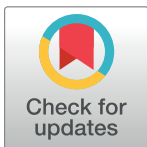

## OPEN ACCESS

**Citation:** The PLOS ONE Staff (2018) Correction: A single  $\beta$ -octyl glucoside molecule induces HIV-1 Nef dimer formation in the absence of partner protein binding. PLoS ONE 13(4): e0196229. <https://doi.org/10.1371/journal.pone.0196229>

**Published:** April 17, 2018

**Copyright:** © 2018 The PLOS ONE Staff. This is an open access article distributed under the terms of the [Creative Commons Attribution License](https://creativecommons.org/licenses/by/4.0/), which permits unrestricted use, distribution, and reproduction in any medium, provided the original author and source are credited.
